# Supplementary material
Source: publisher site journal article supplement (https://www.dovepress.com/article/218905)
Supplement: Supplementary file 1 [file get_supplementary_file.php]

**Supplementary material**

1. **Morphological assessment and thermal analysis**

Morphology of ETD-loaded nanocarriers was observed under transmission and scanning electron microscopes TEM (JEM-100 CX, JEOL, Japan), and SEM (JOEL-JSM-6510, Japan). In TEM, briefly, a drop of each of four nano-formulations after proper dilution with distilled water, was loaded to copper grid, and photographed after drying. Images were captured using JEOL TEM. SEM imaging was elaborated on the freeze-dried formulations. The four nano-formulation dispersions were mixed with 5% mannitol, frozen at -80 ºC for 24 hr and then lyophilized using Cryodos-50 lyophilizer (Telstar Cryodos, Terrassa, Spain). Subsequently, Samples were coated with approximately 10-20 nm gold film for 20s under vacuum using a sputter coater after fixing on metal stubs using double-sided adhesive tape then the size and shape were examined under SEM.

1. **Thermal Analysis**

The thermal analysis of lyophilized N-Phsoms, P-Phsoms, NLCs, AlgNPs were performed using differential scanning calorimeter (DSC) (PerkinElmer Inc., Waltham, MA USA), in comparison to pure ETD and mannitol powder. An amount of 5mg of each freeze-dried formulation was accurately weighed, placed into aluminum pans and sealed with another aluminum lids and tested. The thermograms of the tested samples were elaborated over a temperature range of 30 - 400ºCat scanning rate of 10ºC/min.

1. **Chemopreventive activity**
   1. **Biochemical tests**

**Serum ALT activity**

Serum ALT activity was measured spectrophotometrically using Spectrum Assay Kit . ALT catalyzes the transfer of an amino group from l-alanine to 2-oxoglutarate resulting in the formation of pyruvate and l-glutamate. The pyruvate concentration in the form of hydrazine formed with 2,4-dinitrophenylhydrazine in an alkaline medium is mea­sured spectrophotometrically at 546 nm. Enzyme activity was calculated using pyruvate standard calibration curve. [1](#_ENREF_1)

**Serum AST activity**

Spectrophotometric method was adopted to determine serum AST activity using Spectrum Assay Kit. Oxaloacetate and l-glutamate are formed when AST catalyzes the transfer of an amino group from l-aspartate to 2-oxoglutarate. The oxaloacetate concentration in the form of hydrazone which formed with 2,4-dinitrophenylhydrazine in an alkaline medium is measured spectrophotometrically at 546 nm.[1](#_ENREF_1)

**Serum urea**

Serum urea level was determined by enzymatic colorimetric method using Diamond Diagnostics Assay Kit. First, the urea in sample is enzymatically hydrolyzed into ammonia and carbon dioxide. In the pres­ence of nitroprusside, the formed ammonia ion reacts with salicylate and hypochlorite to give a green indophenol. The color intensity of the green product is measured spectropho­tometrically at 578 nm. [2](#_ENREF_2)

**Serum creatinine**

Serum creatinine level was detected by buffered kinetic Jaffe reaction using Spectrum Assay Kit. Under alkaline condi­tions, creatinine reacts with picric acid to give a yellow–red complex. The color intensity of the product is measured spectrophotometrically at 492 nm. [3](#_ENREF_3)

**Tumor COX2 and PCNA mRNA expression**

Quantitative reverse-transcription PCR (qRT-PCR) was performed to determine the relative expression of COX2 and PCNA mRNA in mice tumor. Therefore, total RNA was extracted from skin samples (30 mg) according to RNeasy Mini Kit protocol though strict RNAse-free conditions. Purity and concentration of RNA were evaluated by NanoDrop 1000 Spectrophotometer (Thermo Scientific, USA). Reverse transcriptase reactions were then performed to form complementary DNA (cDNA) using Superscript II reverse transcriptase kit (Invitrogen, USA). The qRT-PCR was next done in duplicates (25 μl reaction volume) in One Step real-time PCR system (Applied Biosystems, USA) using 1XSybr® Green PCR master mix (Applied Biosystems, USA). In order to confirm the identity of the PCR product, melting curve analysis was performed. StepOne™ Software v2.3 was used for data analysis where samples were normalized to the relative levels of glyceraldehyde 3 phosphate dehydrogenase (GAPDH). [4-7](#_ENREF_4) The results were expressed as fold change of treated groups relative to negative control group.

**Tumor Caspase-3 activity**

As a marker for apoptosis, caspase-3 enzymatic activity was measured by colorimetric reaction using R&D Systems kit. For that purpose, a part of the tumor tissue was homogenized in caspase-3 reaction buffer. [8](#_ENREF_8) Results were normalized to total tissue protein and were expressed relative to the control levels. Moreover, total protein concentration was assessed by the bicinchoninic acid (BCA) protein quantitation kit (Sigma-Aldrich, St. Louis, MO, USA). [9](#_ENREF_9)

**References:**

1. Reitman S, Frankel S. A colorimetric method for the determination of serum glutamic oxalacetic and glutamic pyruvic transaminases. American journal of clinical pathology. 1957;28(1):56-63.

2. Tabacco A, Meiattini F, Moda E, Tarli P. Simplified enzymic/colorimetric serum urea nitrogen determination. Clinical chemistry. 1979;25(2):336-7.

3. Bowers LD, Wong ET. Kinetic serum creatinine assays. II. A critical evaluation and review. Clinical chemistry. 1980;26(5):555-61.

4. Font-Nieves M, Sans-Fons MG, Gorina R, Bonfill-Teixidor E, Salas-Pérdomo A, Márquez-Kisinousky L, et al. Induction of COX-2 and down-regulation of COX-1 expression by LPS control prostaglandin E2 production in astrocytes. Journal of Biological Chemistry. 2012:jbc. M111. 327874.

5. Lin Y, Yang S, Chen C, Kao H, Fang J. Using imiquimod-induced psoriasis-like skin as a model to measure the skin penetration of anti-psoriatic drugs. PloS one. 2015;10(9):e0137890.

6. KJ L, TD S. Analysis of relative gene expression data using real-time quantitative PCR and the 2− ΔΔCT method. . methods. 2001;25(4):402-8.

7. T C, M-Y X, J-J S, R-S Y, X C, R-P S. Porcine milk-derived exosomes promote proliferation of intestinal epithelial cells. Scientific reports. 2016;6:33862.

8. Casciola-Rosen L, Nicholson DW, Chong T, Rowan KR, Thornberry NA, Miller DK, et al. Apopain/CPP32 cleaves proteins that are essential for cellular repair: a fundamental principle of apoptotic death. Journal of Experimental Medicine. 1996;183(5):1957-64.

9. Smith P, Krohn RI, Hermanson G, Mallia A, Gartner F, Provenzano M, et al. Measurement of protein using bicinchoninic acid. Analytical biochemistry. 1985;150(1):76-85.
